# Supplementary material
Source: publisher figshare collection journal article supplement (https://acs.figshare.com/ndownloader/files/10903196)
Supplement: Supplementary file 1 [file 10903196]

## Supporting Information

### **Rational Design of Dimeric Lysine *N*-Alkylamides as Potent and Broad-Spectrum Antibacterial Agents**

Youhong Niu,<sup>†,\*</sup> Minghui Wang,<sup>‡</sup> Yafei Cao,<sup>†</sup> Alekhya Nimmagadda,<sup>‡</sup> Jianxing Hu,<sup>†</sup>  
Yanfen Wu,<sup>†</sup> Jianfeng Cai,<sup>‡,\*</sup> and Xin-Shan Ye<sup>†,\*</sup>

<sup>†</sup>State Key Laboratory of Natural and Biomimetic Drugs, School of Pharmaceutical Sciences,  
Peking University, Xue Yuan Road No. 38, Beijing 100191, China

<sup>‡</sup>Department of Chemistry, University of South Florida, 4202 E. Fowler Avenue, Tampa,  
Florida 33620, United States

#### **Content:**

1. Correlation of antibacterial activity (MIC) against MRSA and *E. coli* vers AlogP of compounds **3a-3i**
2. <sup>1</sup>H NMR and <sup>13</sup>C NMR spectra of compounds **1, 2, 3a-3i**
3. HPLC analysis of compounds **3a-3i**

1. Correlation of antibacterial activity (MIC) against MRSA and *E. coli* vers AlogP of compounds **3a-3i**

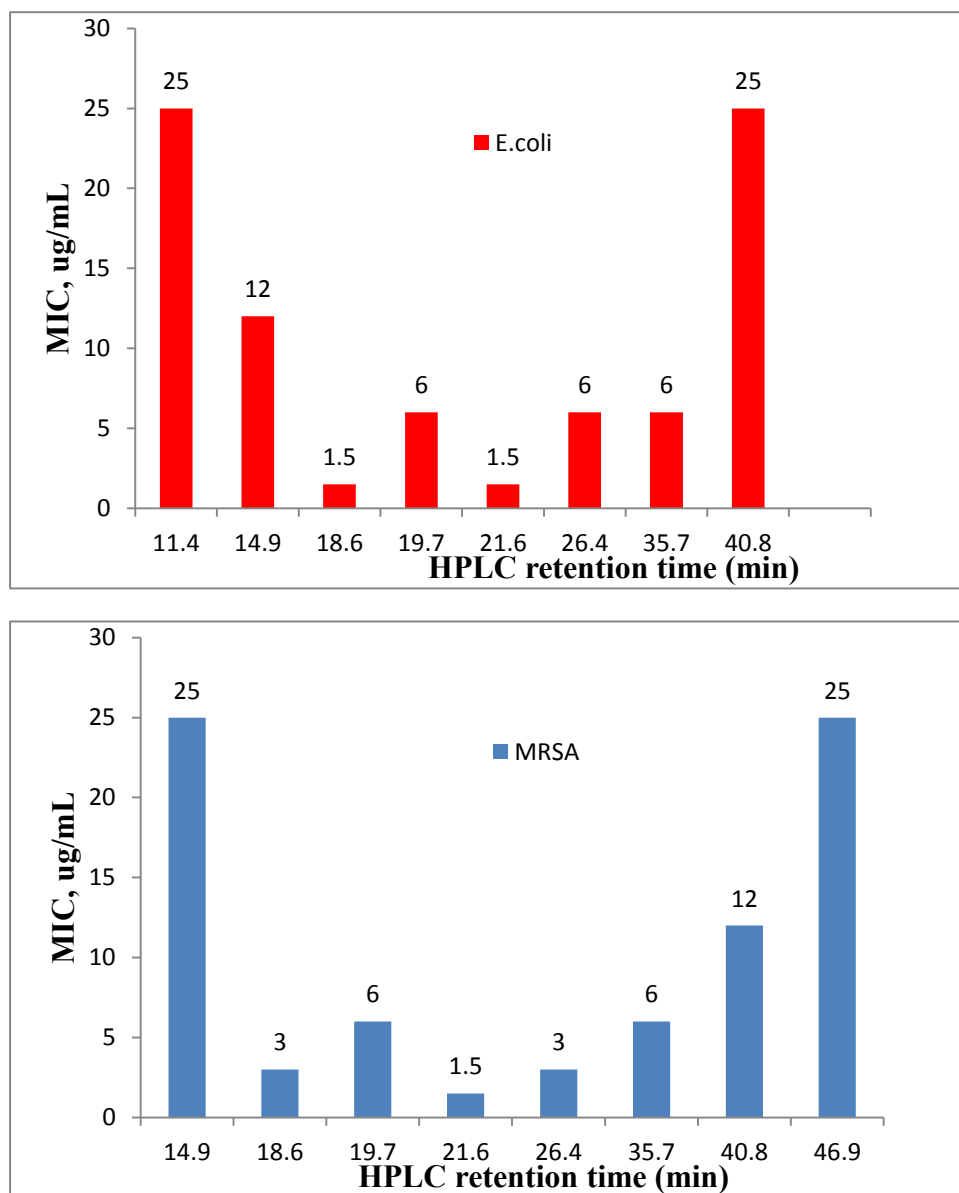

**Figure S1.** Correlation of antibacterial activity (MIC) against MRSA and *E. coli* with HPLC retention time of compounds **3a-3i**

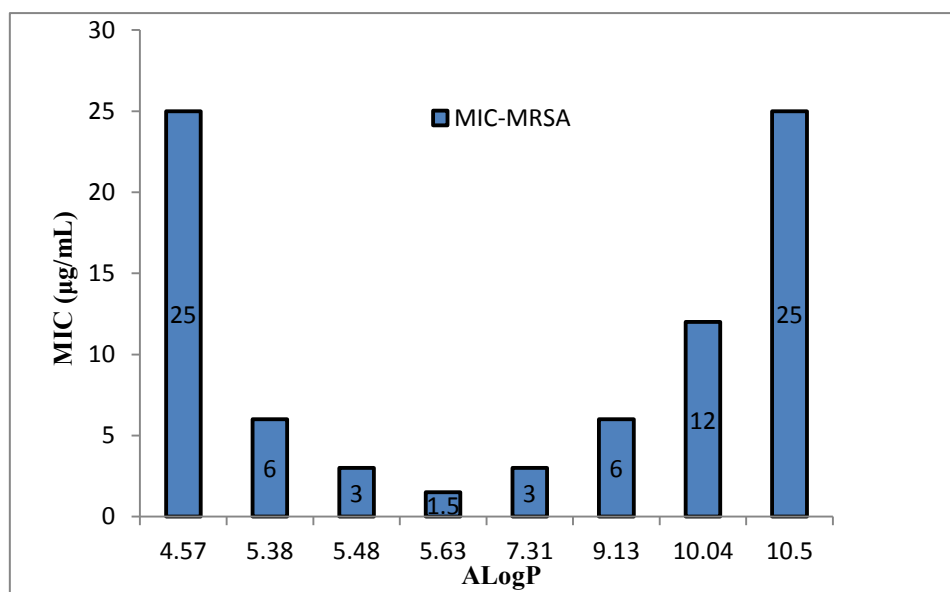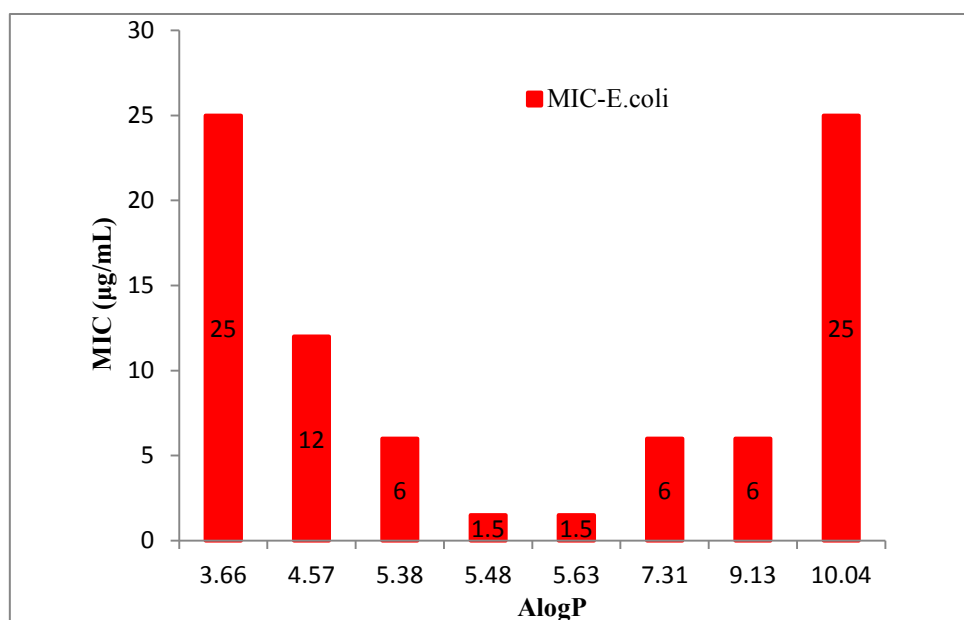

**Figure S2.** Correlation of antibacterial activity (MIC) against MRSA and *E. coli* with ALogP of compounds **3a-3i**

2.  $^1\text{H}$  NMR and  $^{13}\text{C}$  NMR spectra of compounds **1**, **2**, **3a-3i**

$^1\text{H}$  NMR (400MHz,  $\text{CDCl}_3$ ) spectrum of compound **1**

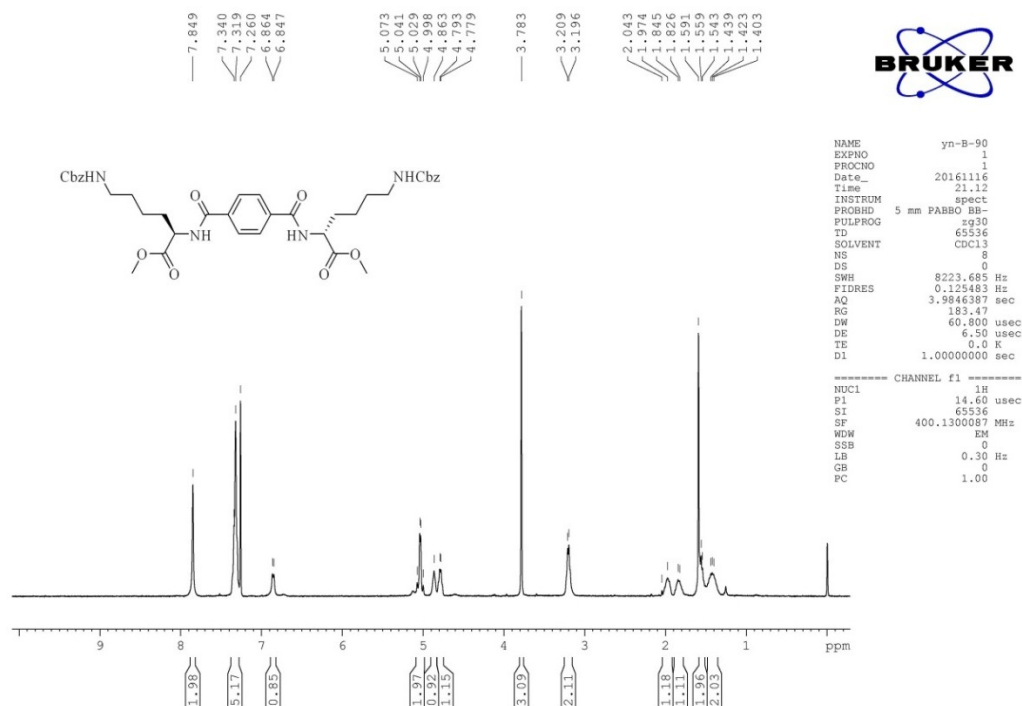

$^{13}\text{C}$  NMR (101 MHz,  $\text{CDCl}_3$ ) spectrum of compound **1**

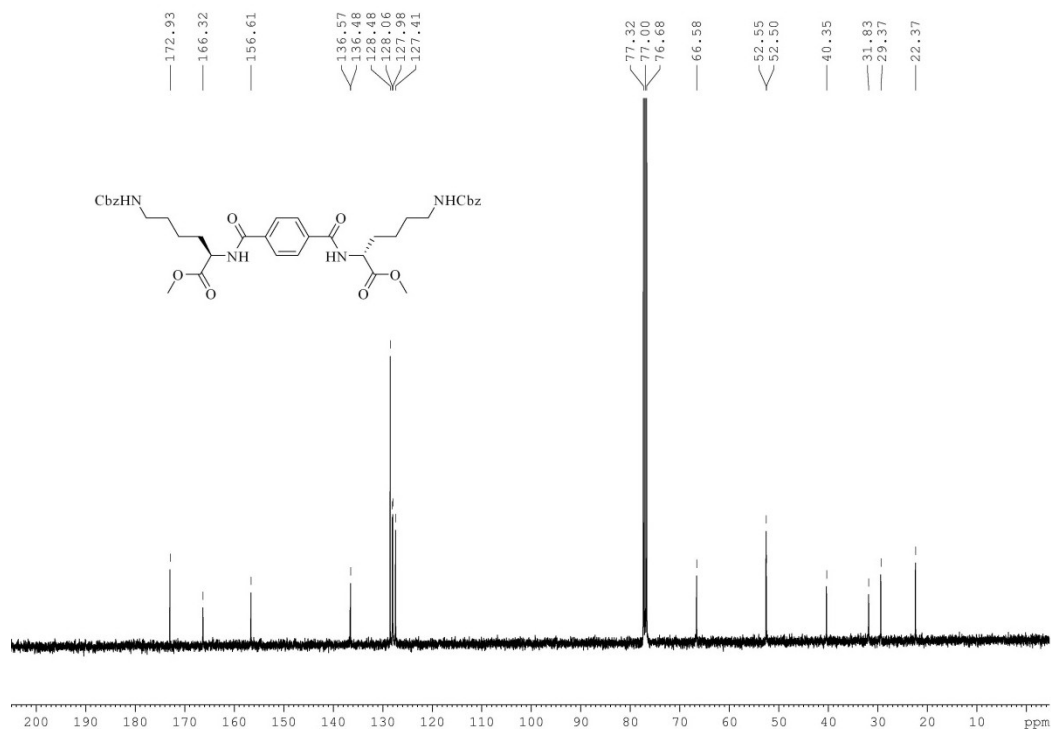

**<sup>1</sup>H NMR (400MHz, CD<sub>3</sub>OD) spectrum of compound 2**

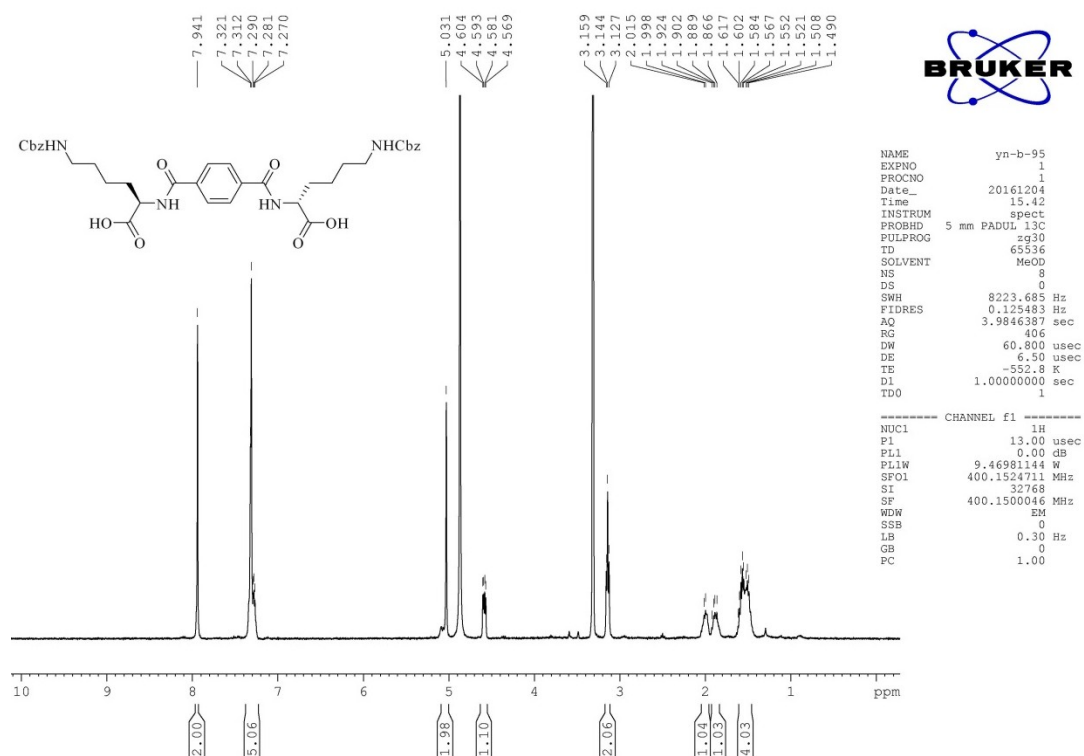

**<sup>13</sup>C NMR (101 MHz, CD<sub>3</sub>OD) spectrum of compound 2**

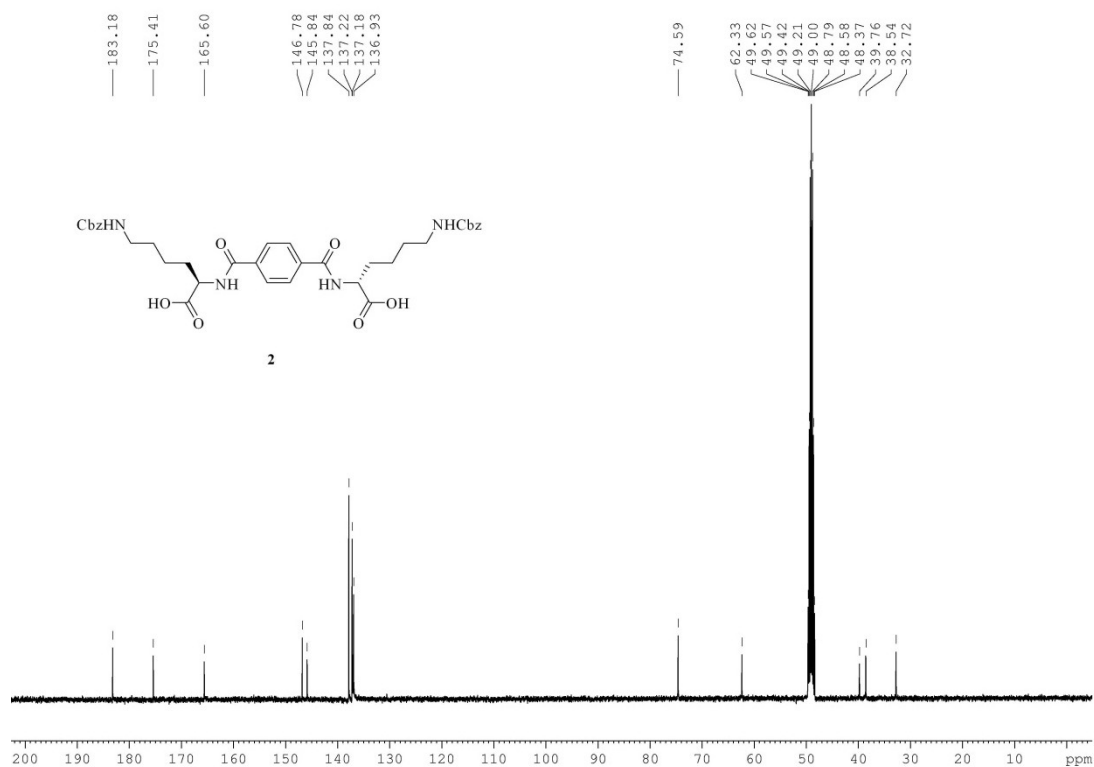

**$^1\text{H}$  NMR (400MHz,  $\text{CD}_3\text{OD}$ ) spectrum of compound 3a**

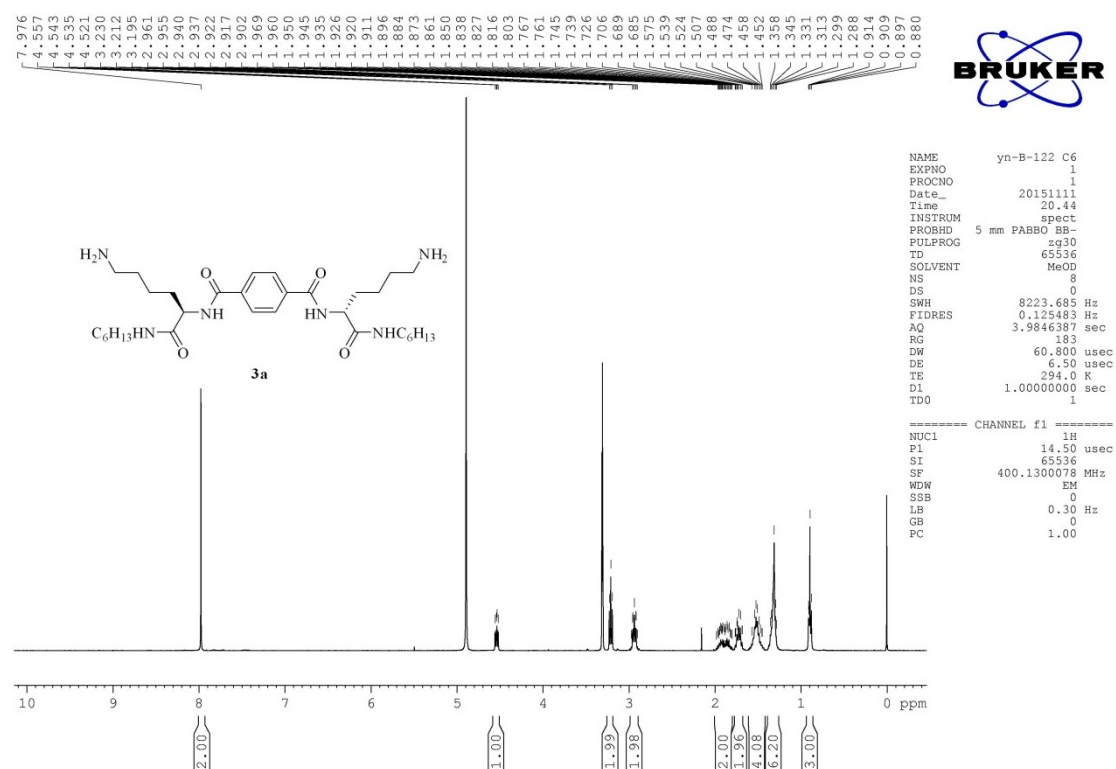

**$^{13}\text{C}$  NMR (101 MHz,  $\text{CD}_3\text{OD}$ ) spectrum of compound 3a**

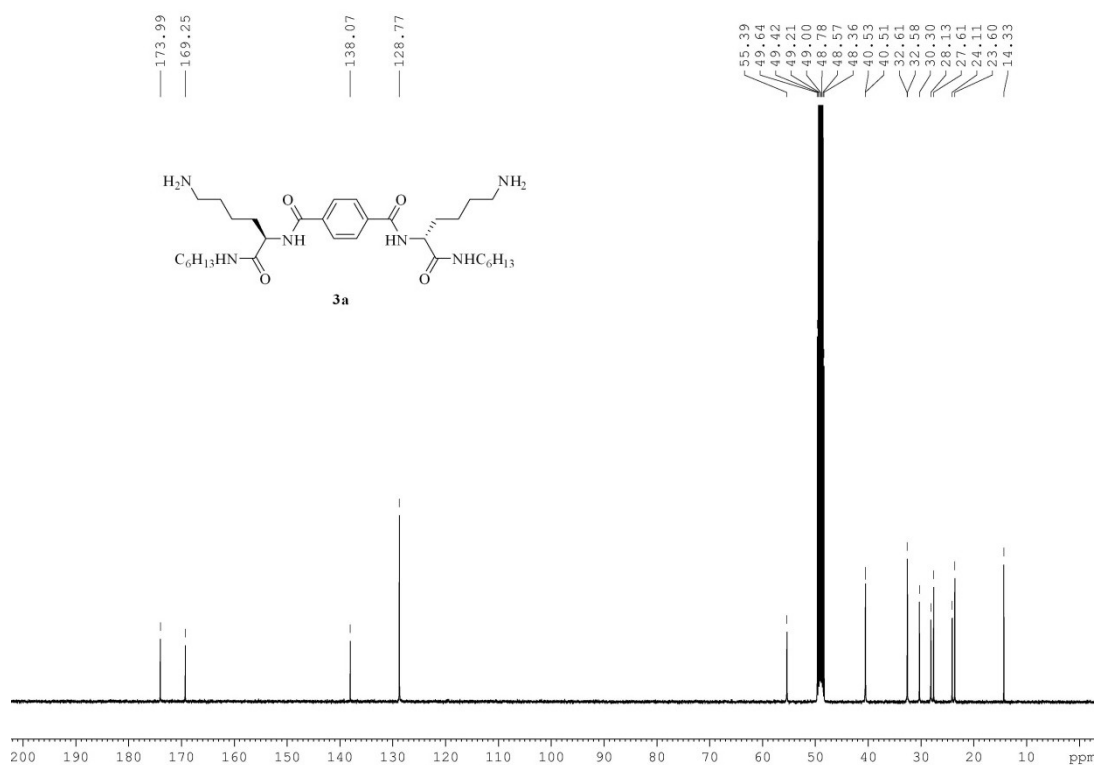

**<sup>1</sup>H NMR (400MHz, CD<sub>3</sub>OD) spectrum of compound 3b**

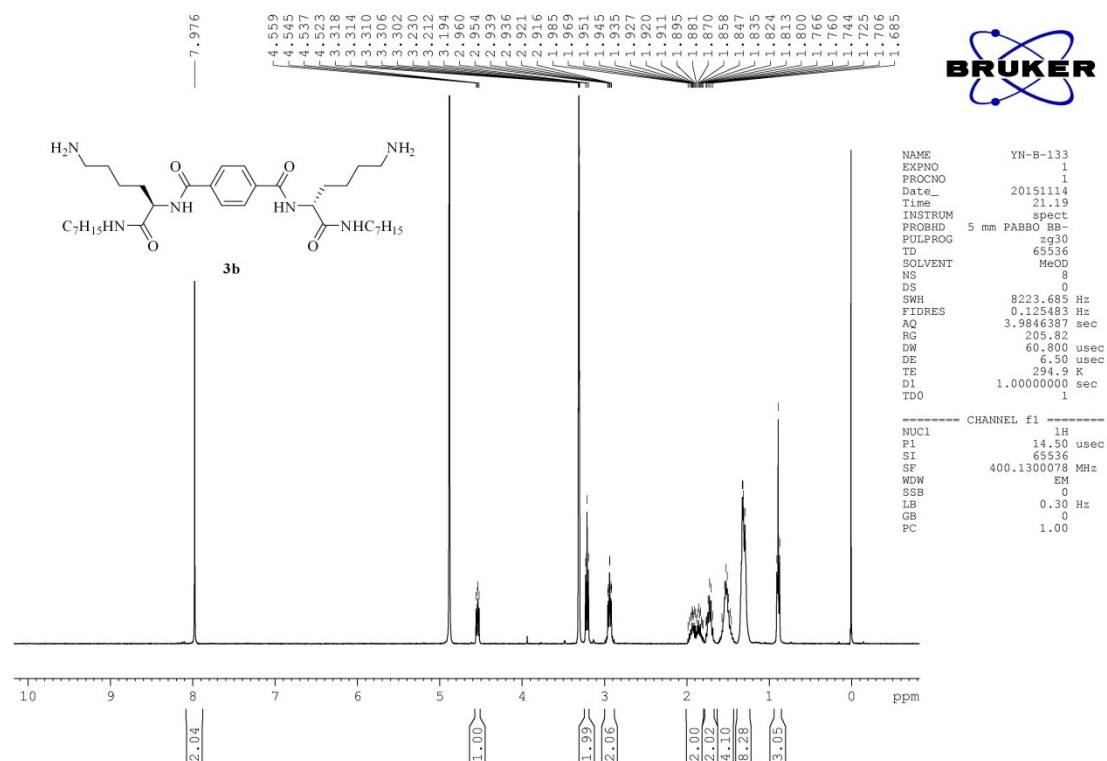

**<sup>1</sup>H NMR (400MHz, CD<sub>3</sub>OD) spectrum of compound 3c**

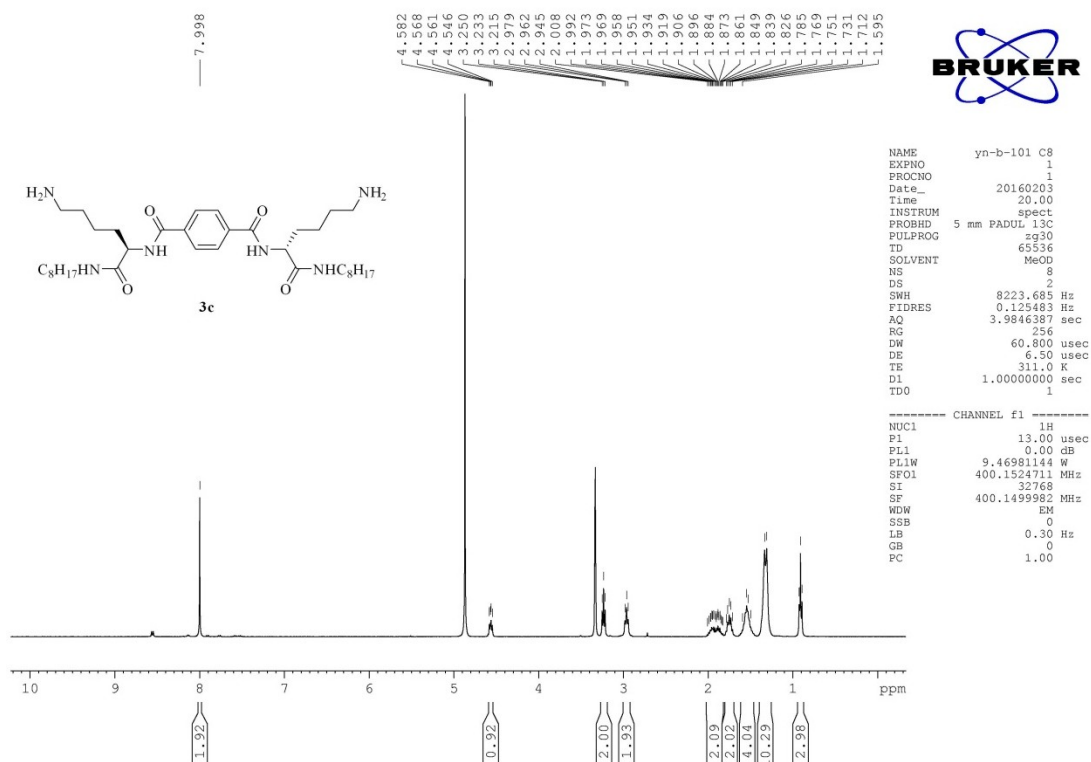

**<sup>13</sup>C NMR (101 MHz, CD<sub>3</sub>OD) spectrum of compound 3c**

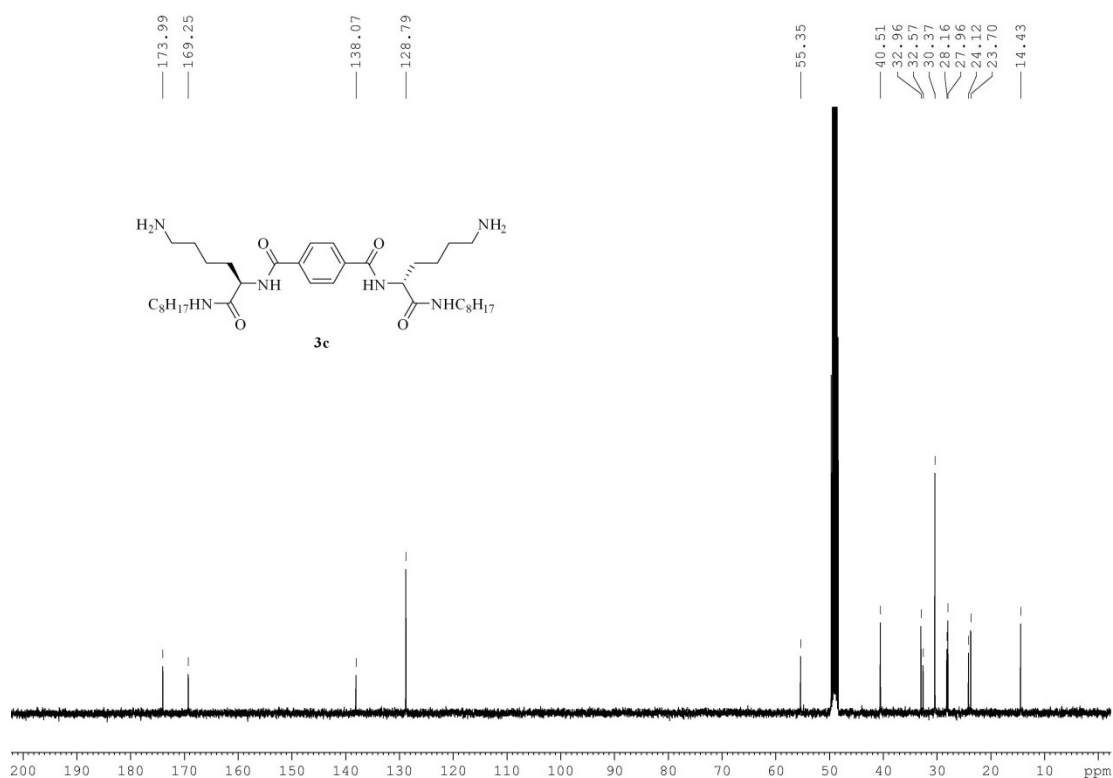



**<sup>1</sup>H NMR (400MHz, CD<sub>3</sub>OD) spectrum of compound 3d**

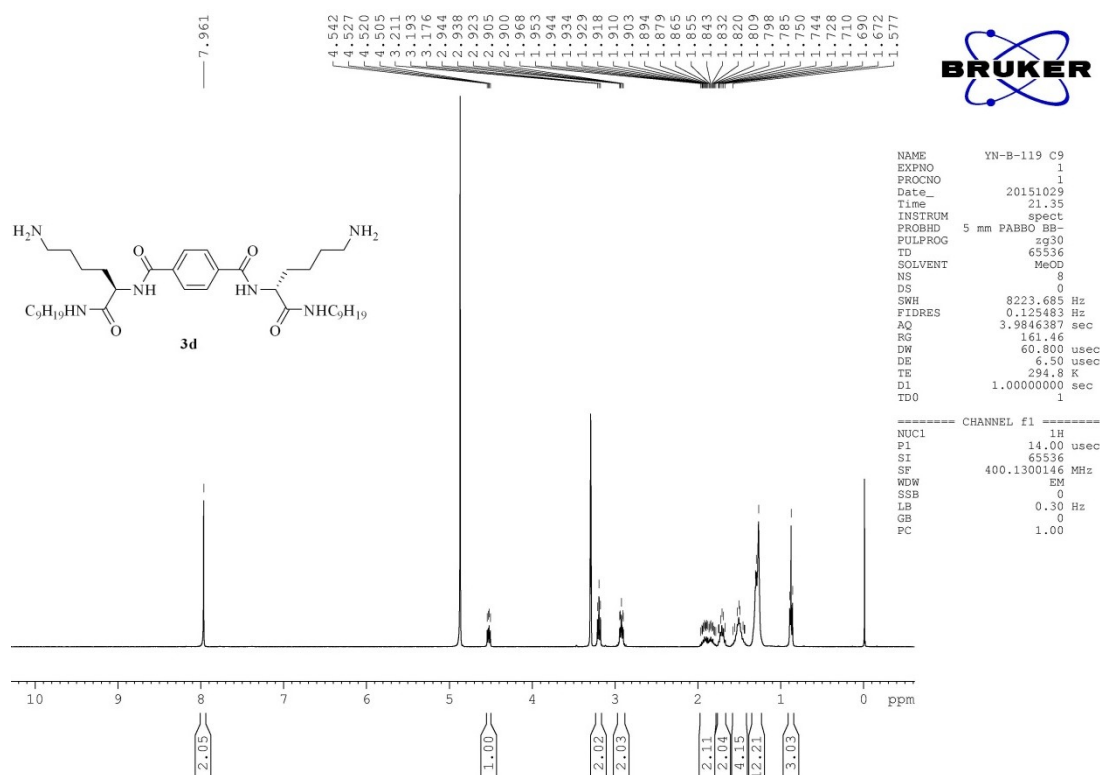

**<sup>13</sup>C NMR (101 MHz, CD<sub>3</sub>OD) spectrum of compound 3d**

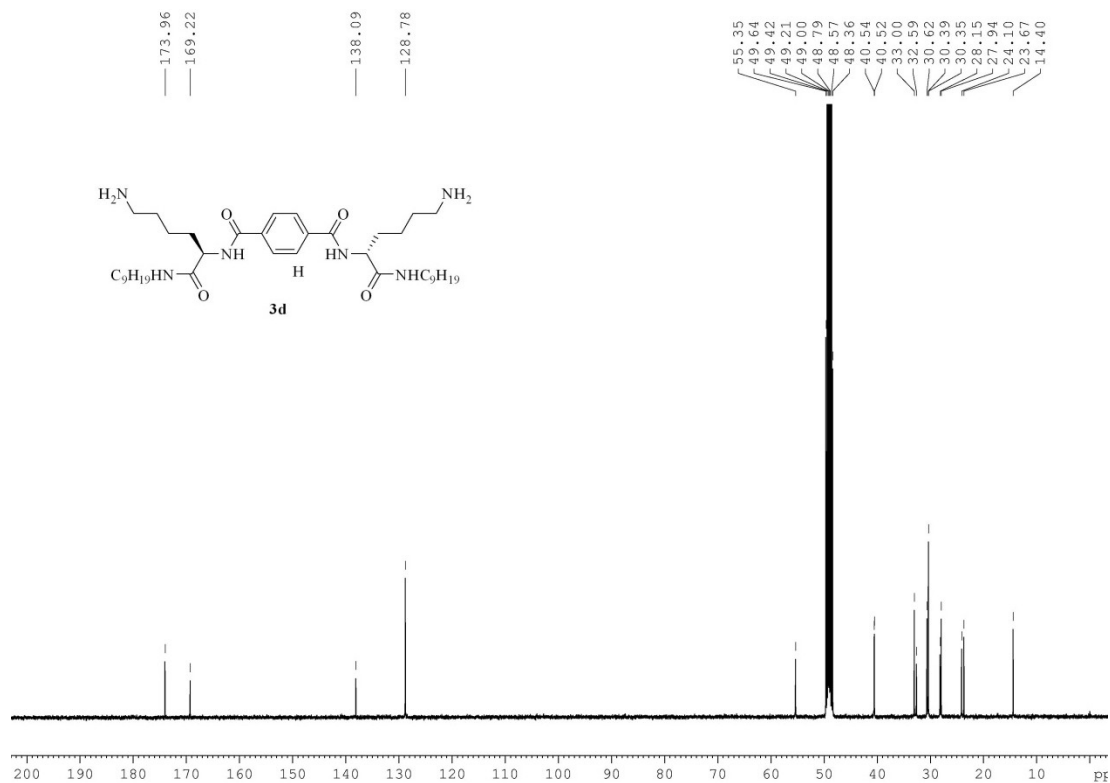

**<sup>1</sup>H NMR (400MHz, CD<sub>3</sub>OD) spectrum of compound 3e**

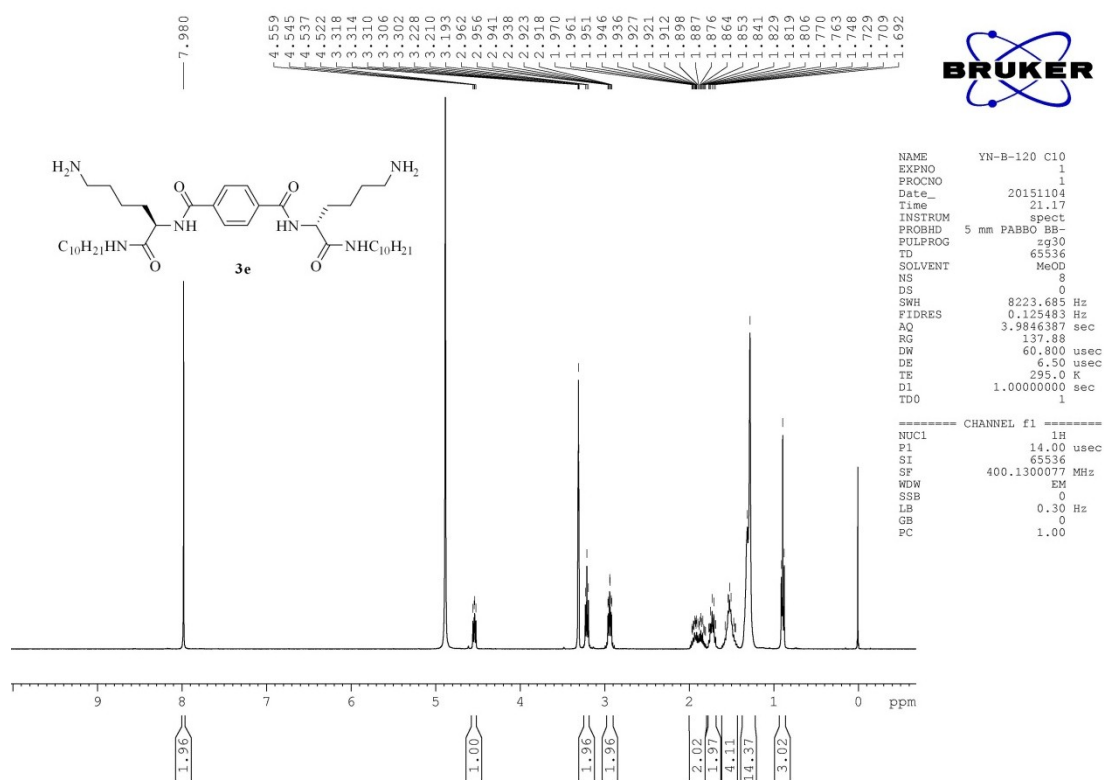

**<sup>13</sup>C NMR (101 MHz, CD<sub>3</sub>OD) spectrum of compound 3e**

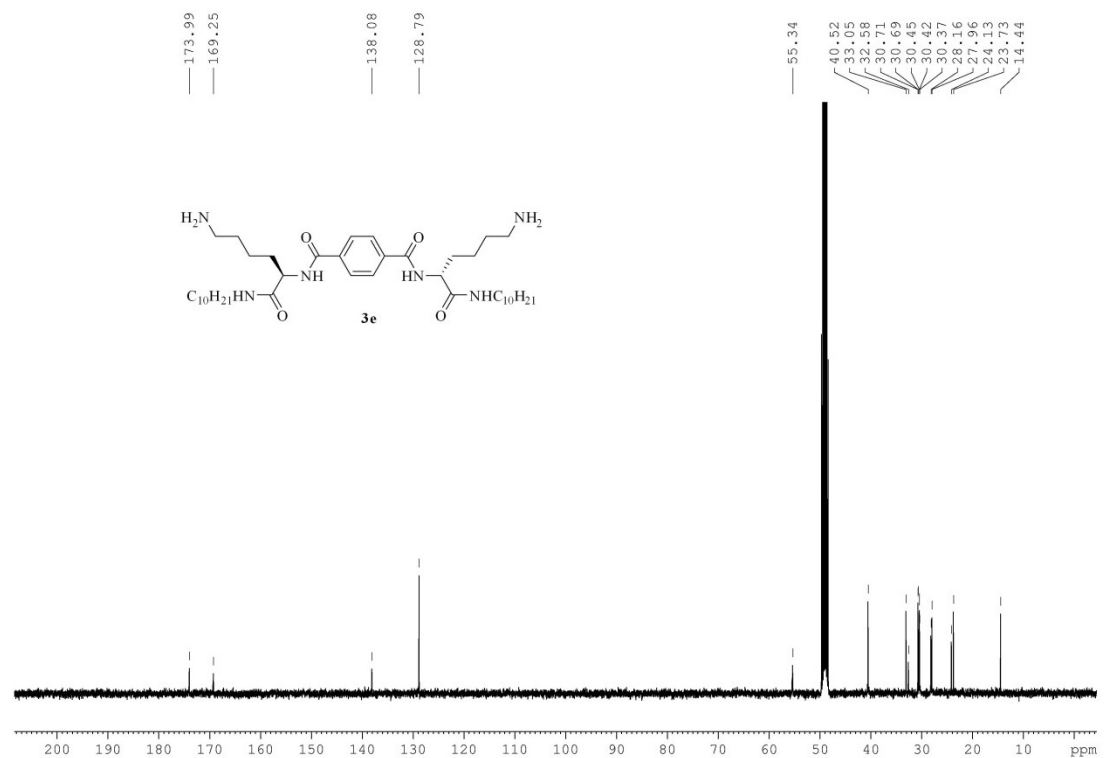

**<sup>1</sup>H NMR (400MHz, CD<sub>3</sub>OD) spectrum of compound 3f**

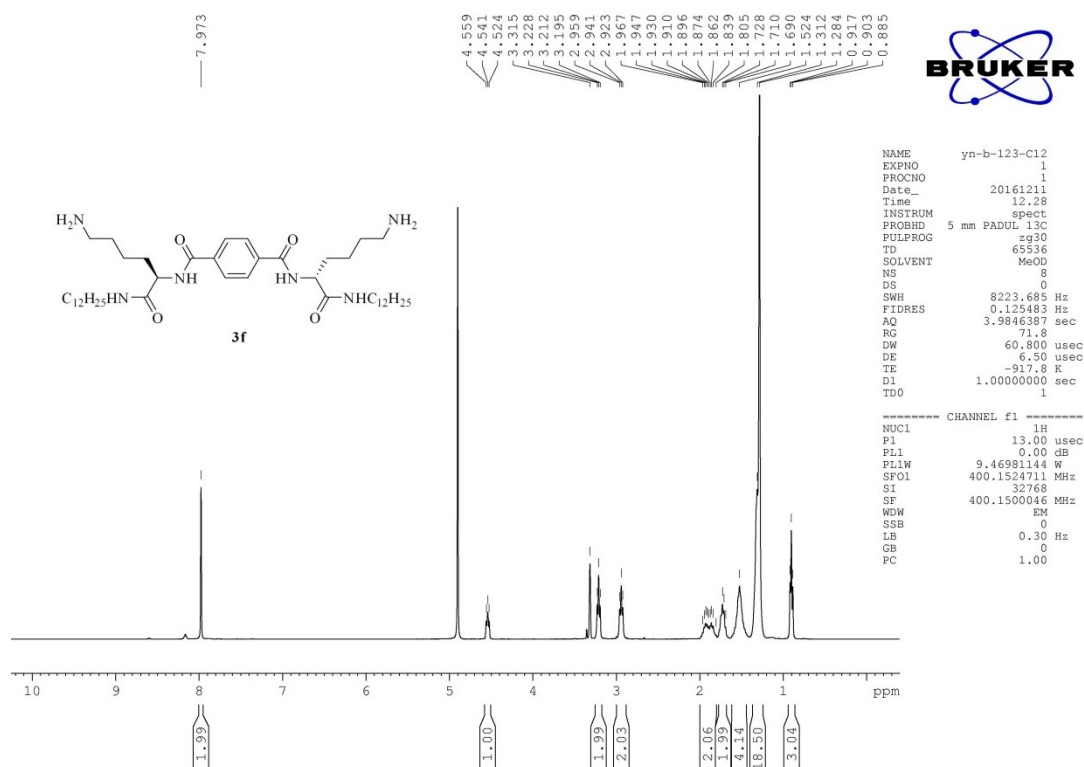

**<sup>13</sup>C NMR (101 MHz, CD<sub>3</sub>OD) spectrum of compound 3f**

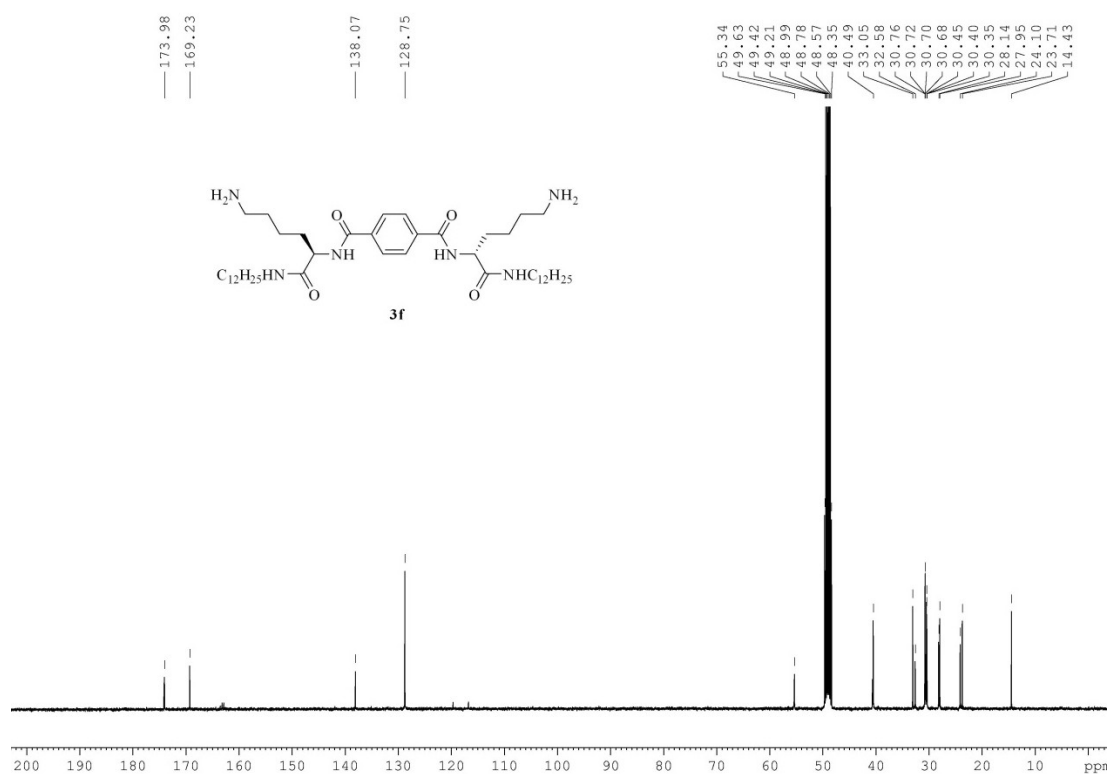

**<sup>1</sup>H NMR (400MHz, CD<sub>3</sub>OD) spectrum of compound 3g**

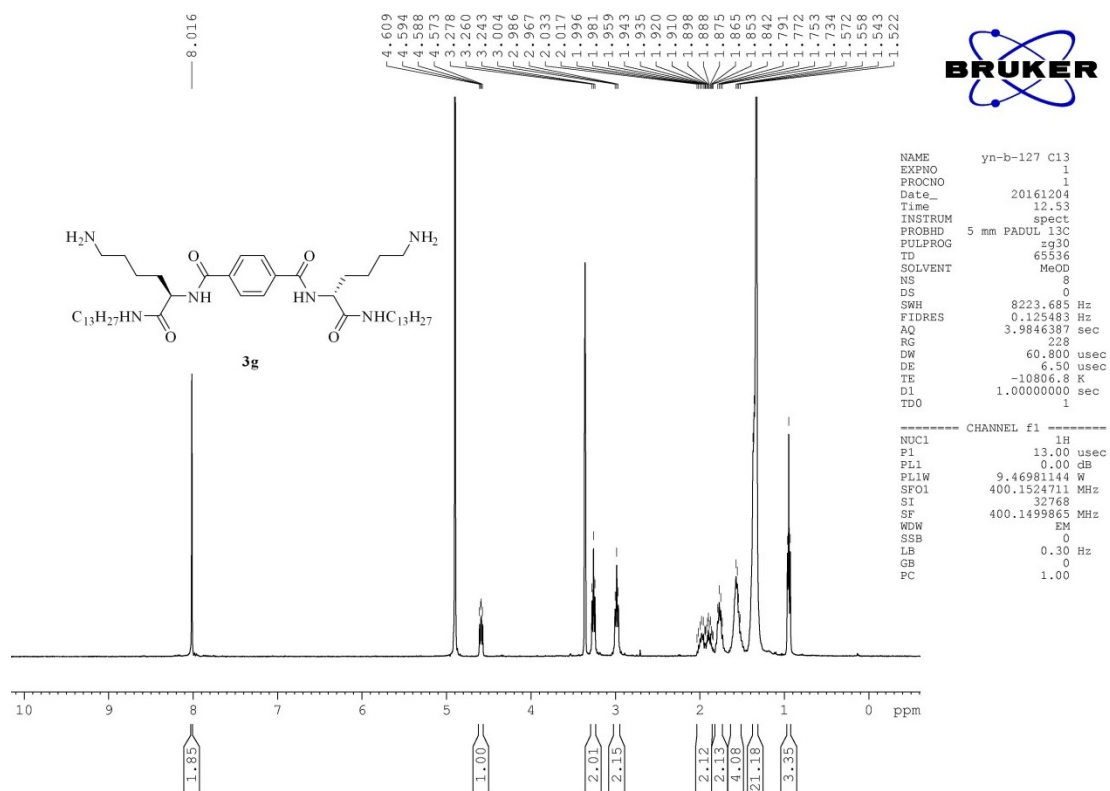

**<sup>13</sup>C NMR (101 MHz, CD<sub>3</sub>OD) spectrum of compound 3g**

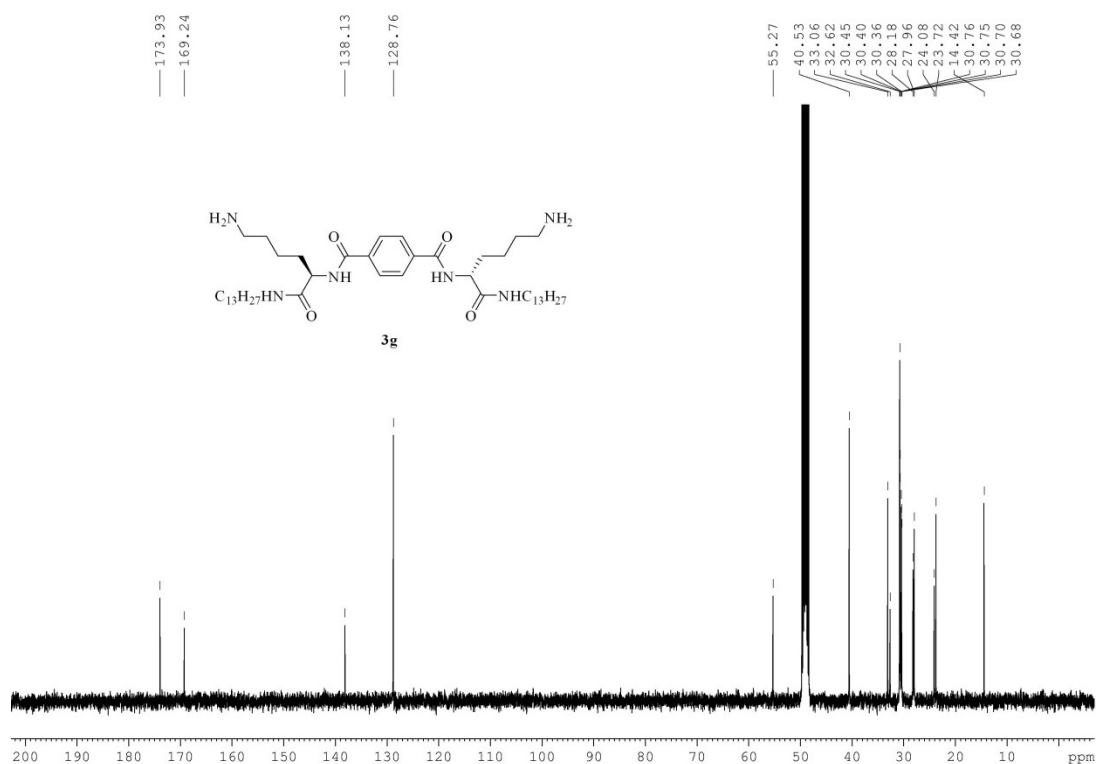

**<sup>1</sup>H NMR (400MHz, CD<sub>3</sub>OD) spectrum of compound 3h**

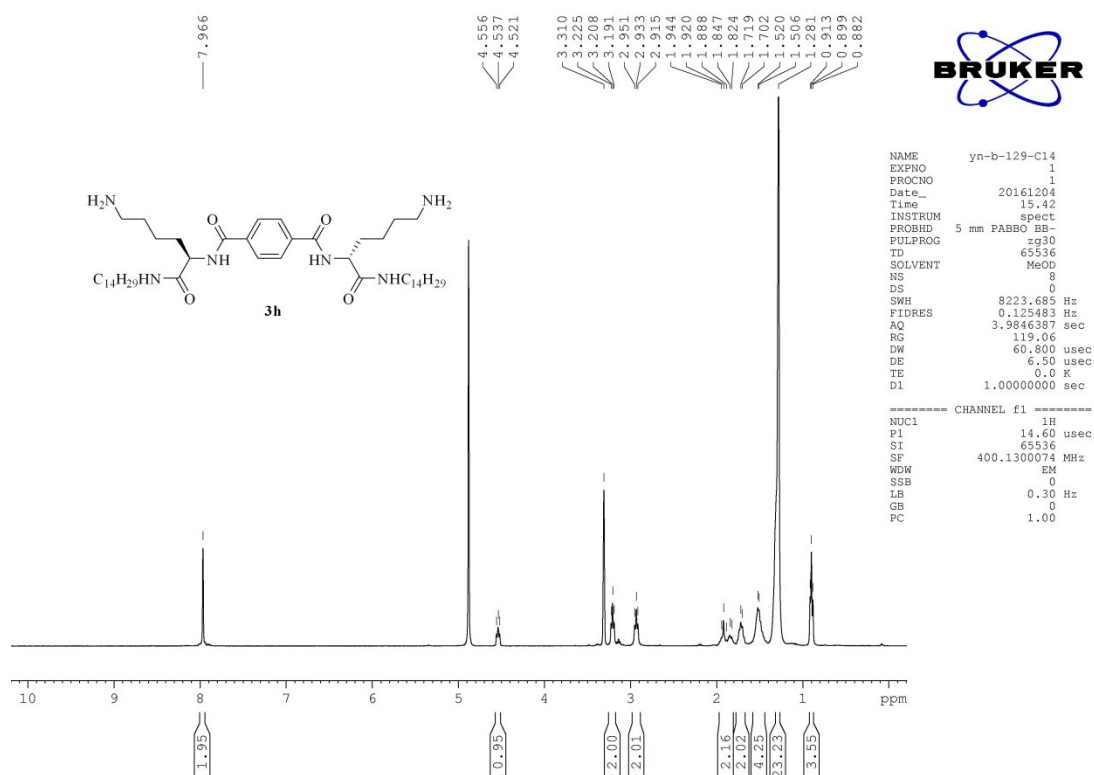

**<sup>13</sup>C NMR (101 MHz, CD<sub>3</sub>OD) spectrum of compound 3h**

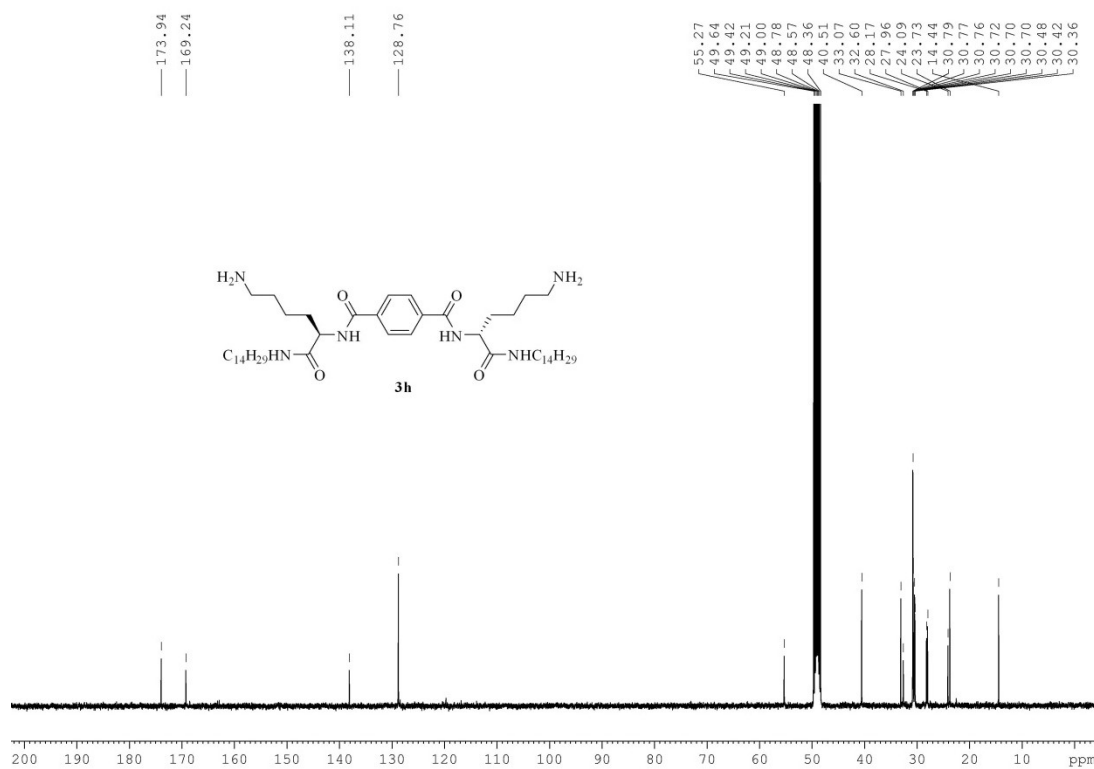

**<sup>1</sup>H NMR (400MHz, CD<sub>3</sub>OD) spectrum of compound 3i**

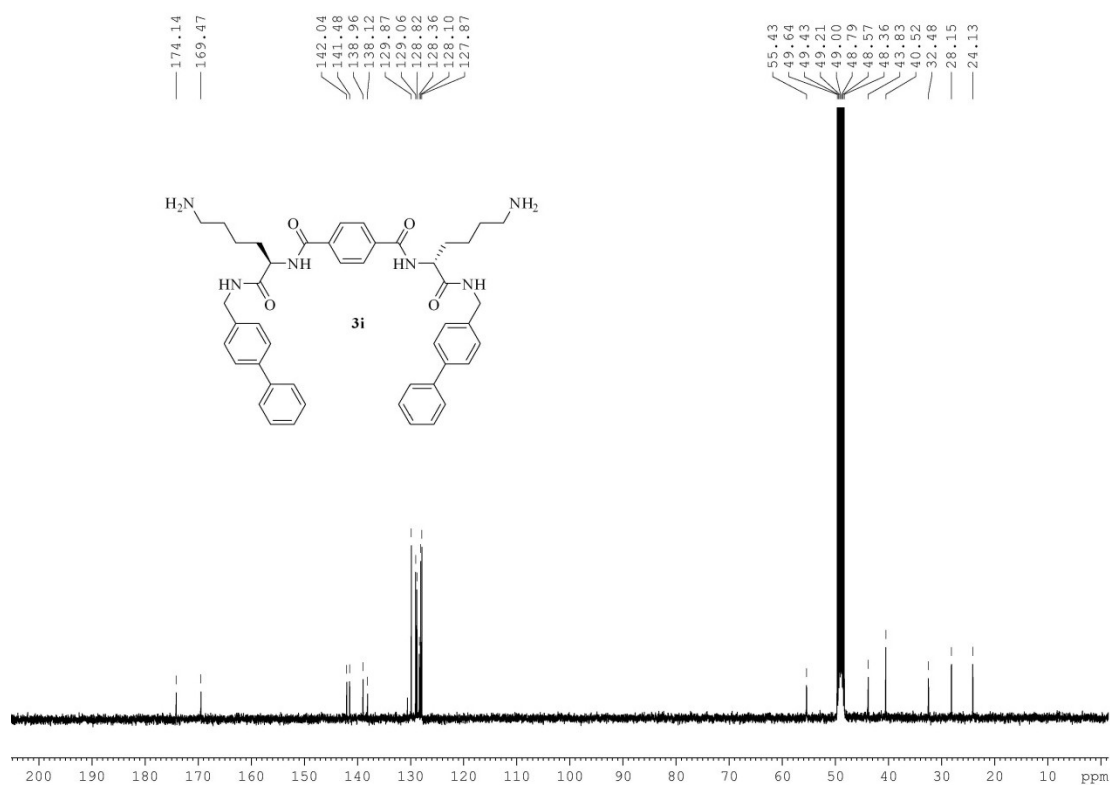

**<sup>13</sup>C NMR (101 MHz, CD<sub>3</sub>OD) spectrum of compound 3i**

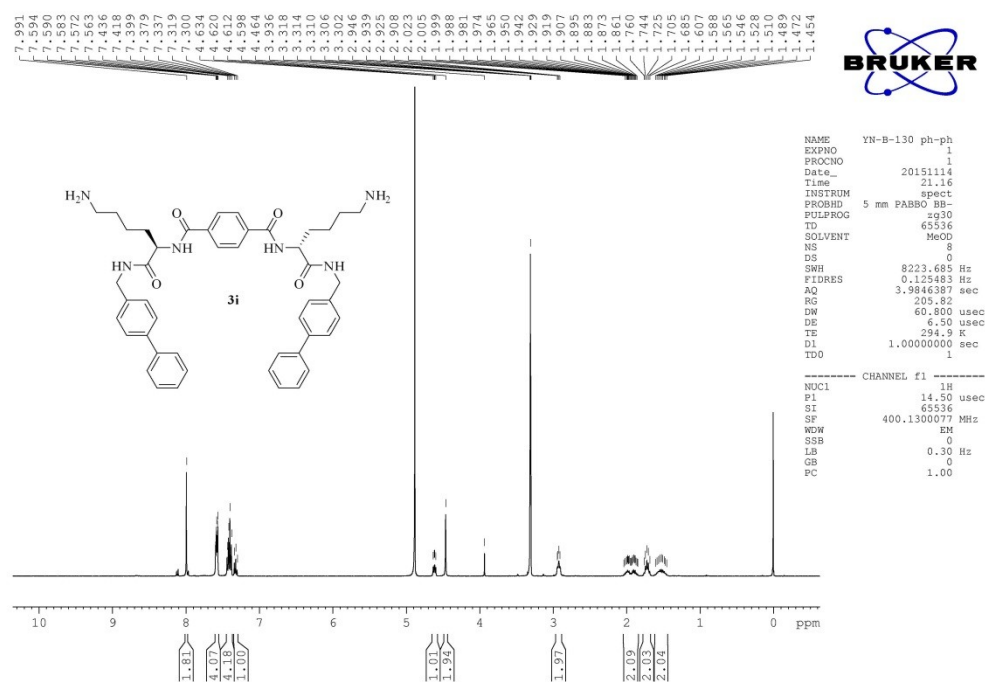

### 3. HPLC analysis of compounds **3a-3i**

**Table S1.** HPLC purities and retention time of compounds **3a-3i**

| compounds           | <b>3a</b> | <b>3b</b> | <b>3c</b> | <b>3d</b> | <b>3e</b> | <b>3f</b> | <b>3g</b> | <b>3h</b> | <b>3i</b> |
|---------------------|-----------|-----------|-----------|-----------|-----------|-----------|-----------|-----------|-----------|
| Retention time(min) | 11.4      | 14.9      | 18.6      | 21.6      | 26.4      | 35.7      | 40.8      | 46.9      | 19.7      |
| Purities (%)        | 96.4      | 96.3      | 97.3      | 99        | >99       | 98.5      | 98.2      | 95.9      | 97.9      |

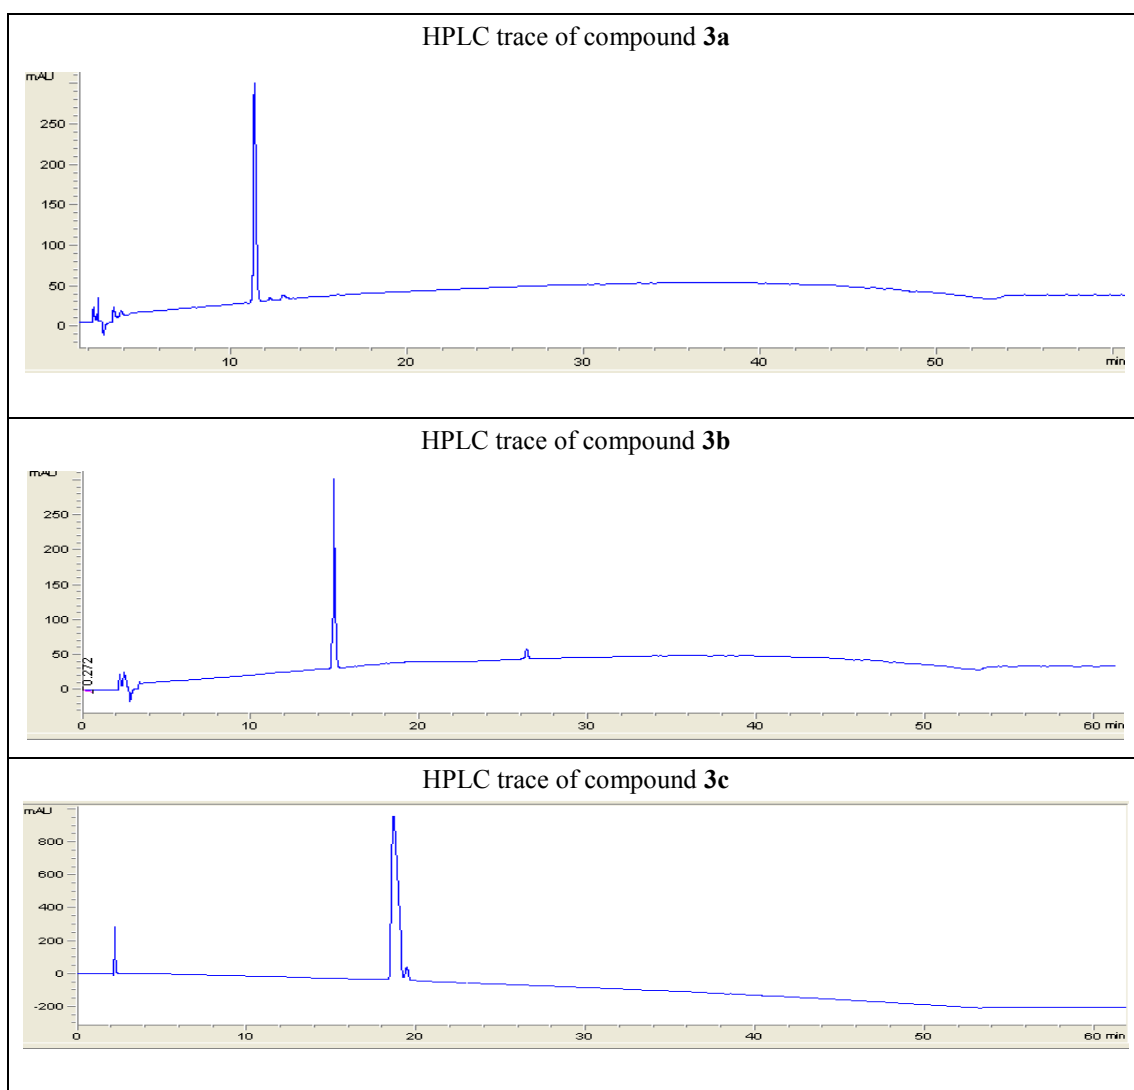

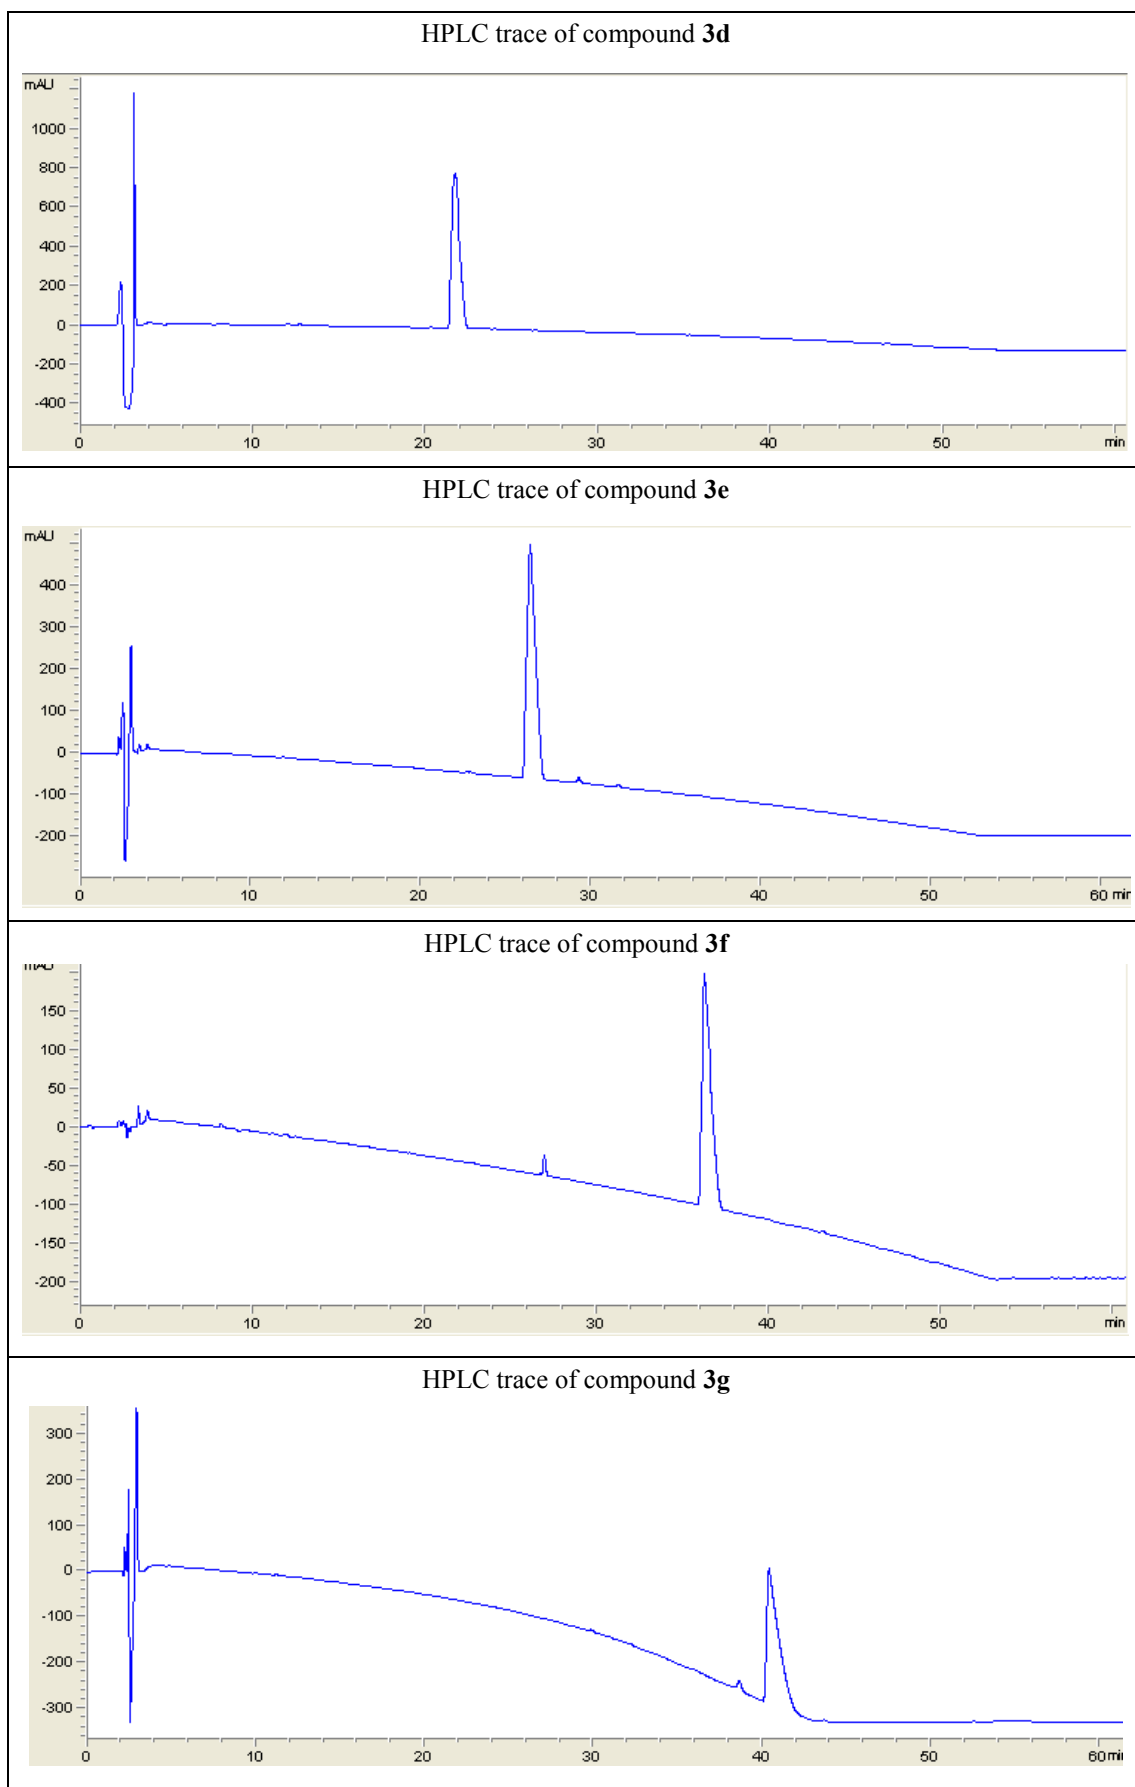



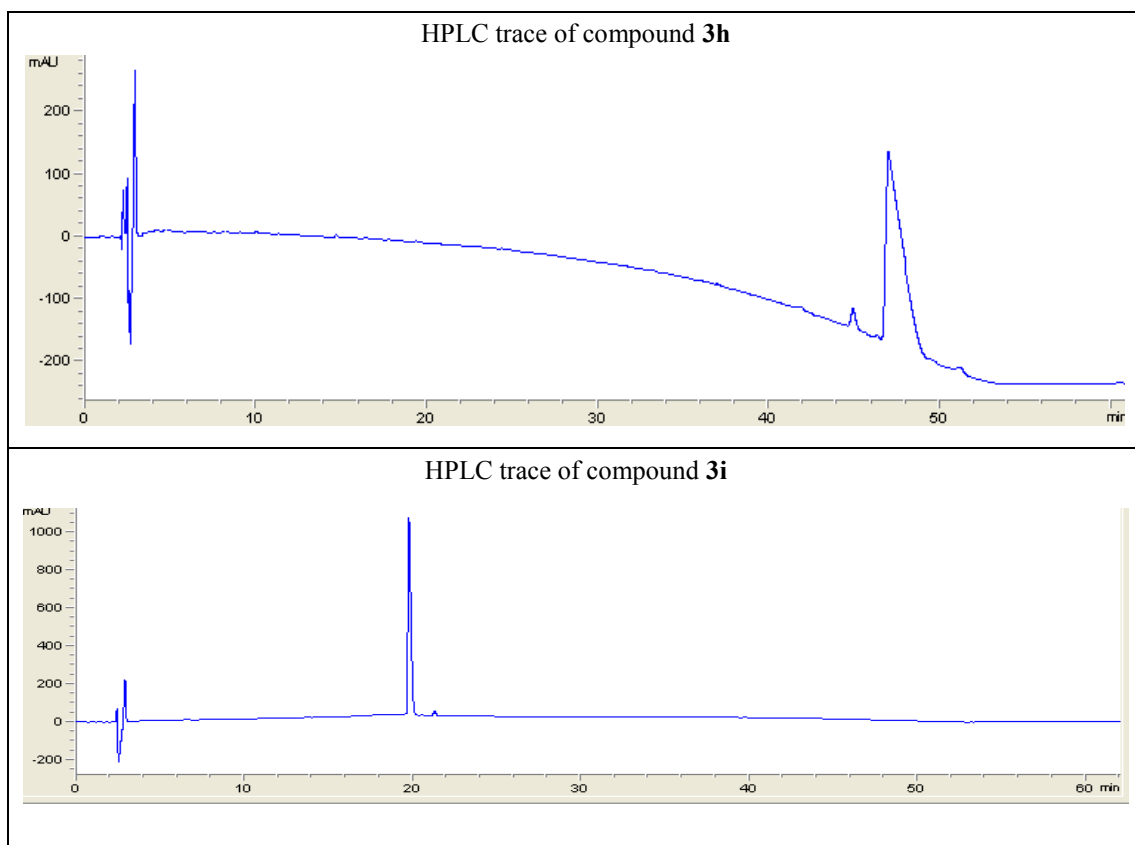

**Figure S3.** HPLC spectra of compound **3a-3i**
